# Supplementary material
Source: PubMed Central journal article supplement (PMC2129128)

## SUPPLEMENTAL ONLINE FIGURES

**Supplemental Figure 1.** Sensitivity analysis to determine parameter ranges: When other kinetic rates are kept at default values, kinetic off-rates corresponding to the minimum HIF1 $\alpha$  half-lives of 5 and 8 min respectively are:  $k_{\text{cat,H}\alpha} = 0.098\text{-}0.164 \text{ min}^{-1}$  (i),  $k_{\text{off,Fe}2} = 0.019\text{-}36 \text{ min}^{-1}$  (ii),  $k_{\text{off,DG}} = 0.044\text{-}10.8 \text{ min}^{-1}$  (iii),  $k_{\text{off,O}2} = 0.044\text{-}10.8 \text{ min}^{-1}$  (iv), and  $k_{\text{off,AS}} = 0.0036\text{-}3.6 \text{ min}^{-1}$  (v). Values of  $k_{\text{off,DG}}$  and  $k_{\text{off,O}2}$  above  $10.8 \text{ min}^{-1}$  yield the same response curve as that for  $10.8 \text{ min}^{-1}$ . (vi) The off-rate for unhydroxylated HIF1 $\alpha$  corresponding to a minimum HIF1 $\alpha$  half-life of 5 min is  $k_{\text{off,H}\alpha} = 0.7 \text{ min}^{-1}$ ; the sensitivity to this parameter is low, with all response curves intersecting beyond 6 min.

**Supplemental Figure 2.** Comparison of initial reaction rate to experiments was used to narrow the kinetic parameter ranges. (i)  $k_{\text{cat,H}\alpha} = 0.098\text{-}0.164 \text{ min}^{-1}$  corresponds to minimum HIF1 $\alpha$  half-lives of 5 and 8 min respectively, and this range compares well with the specific activity from (Tuckerman et al., 2004). This  $k_{\text{cat,H}\alpha}$  range was used in calculations of subsequent kinetic parameters. (ii) From the minimum range of  $0.019\text{-}36 \text{ min}^{-1}$  calculated for  $k_{\text{off,Fe}2}$  from HIF1 $\alpha$  half-lives,  $k_{\text{off,Fe}2} = 36 \text{ min}^{-1}$  corresponds best to the experimentally-determined specific activity. (iii)  $k_{\text{off,DG}} = 10.8 \text{ min}^{-1}$  is the analogous value for 2-oxoglutarate unbinding to PHD2. (iv) For O<sub>2</sub>, this value is  $k_{\text{off,O}2} = 10.8 \text{ min}^{-1}$  and for ascorbate,  $k_{\text{off,AS}} = 3.6 \text{ min}^{-1}$  (v).  $k_{\text{off,H}\alpha} = 0.7 \text{ min}^{-1}$  was the best value within the range estimated from half-life comparisons, that correlates with the specific activity data shown (vi).

**Supplemental Figure 3.** Sensitivity of HIF1 $\alpha$  hydroxylation to concentrations of reactants. The upper curve in both graphs corresponds to initial concentrations of unhydroxylated  $[\text{HIF1}\alpha]_0 = 1 \text{ }\mu\text{M}$ ;  $[\text{PHD2}]_0 = 1 \text{ }\mu\text{M}$ ; and  $[\text{Fe}^{2+}]_0 = 50 \text{ }\mu\text{M}$ , as frequently used by in vitro experiments. (i) Decreasing  $[\text{Fe}^{2+}]$  results in a large reduction of hydroxylation. In vivo, total cellular  $\text{Fe}^{2+}$  concentrations vary from 20-200  $\mu\text{M}$  (Arredondo et al., 1997; Hirsila et al., 2005). The fraction that is freely available for binding to PHD2 depends on cell type; in cultured insect cells used for HIF1 $\alpha$  experiments, it has been estimated as 0.3-0.8

$\mu\text{M}$  (without addition of  $\text{Fe}^{2+}$  to the culture) (Esposito et al., 2002). (ii) Decreasing  $[\text{PHD2}]_0$  also results in a steep reduction of hydroxylation. In vivo levels of PHD2, if they can be approximated by in vitro cell extracts, are on the order of 4 nM (Tuckerman et al., 2004). Compared to  $\text{Fe}^{2+}$  and PHD2, ascorbate has minimal effects on each cycle of the hydroxylation reaction; see Figure 2.

**Supplemental Figure 4.** Using the newly reported  $K_m$  value of 0.03  $\mu\text{M}$  for binding of iron to PHD2 (Hirsila et al., 2005), the model predicts a maximum specific activity of 411 mol/mol/min {calculated from the slope of the tangent to the curve in (i)}, during the first six minutes of the hydroxylation reaction. This is 10-fold greater than predicted by (Hirsila et al., 2005), where minimum PHD2 specific activity is estimated as 40-50 mol/mol/min. An exhaustive search for parameter sets using  $K_{m,\text{Fe}2} = 0.03 \mu\text{M}$  found no binding on and off-rates that represented well both HIF1 $\alpha$  half-lives and PHD2 specific activity reported in literature. The closest match, yielding a HIF1 $\alpha$  half-life of 8 min (ii), was found using the rates shown in (i).

**Supplemental Figure 5.** Calculations of half-lives (i, iii) and PHD2 specific activity (ii, iv) from the model, with different Michaelis-Menten constant  $K_m$  values. Sensitivity analysis was performed for all kinetic parameters found from experiments, and comparisons were made to experiments on HIF1 $\alpha$  half-life (Berra et al., 2001) and PHD2 specific activity (Tuckerman et al., 2004). Examples are shown for  $K_{m,\text{Fe}2}$  (i,ii) and  $K_{m,\text{DG}}$  (iii,iv).

**Supplemental Figure 6.** Relative HIF1 $\alpha$  hydroxylated at different  $\text{O}_2$  levels after 5 and 20 minutes, for different values of  $K_m$ 's.  $K_m$  is the experimentally determined Michaelis-Menten constant. Examples are shown for iron,  $0.025K_{m,\text{Fe}2}$  to  $2 K_{m,\text{Fe}2}$  (i), and for 2-oxoglutarate,  $0.2K_{m,\text{DG}}$  to  $2K_{m,\text{DG}}$  (ii).

SUPPLEMENTAL FIGURE 1

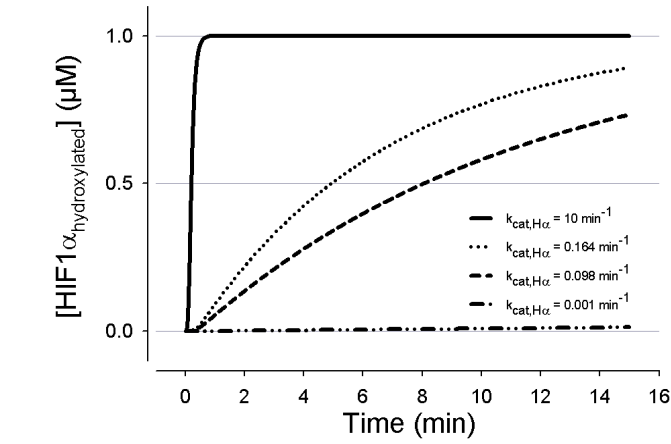

i

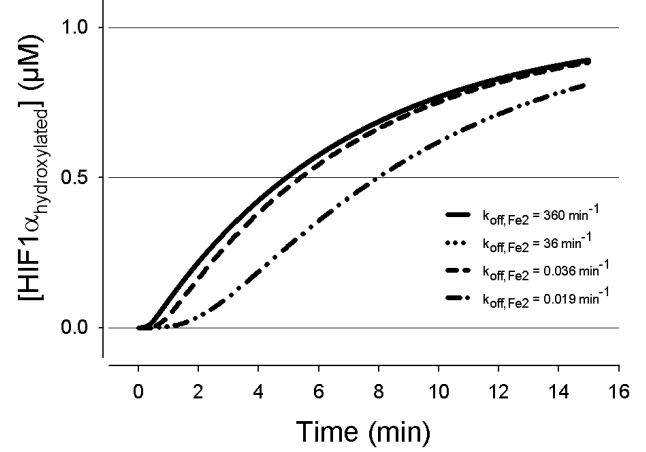

ii

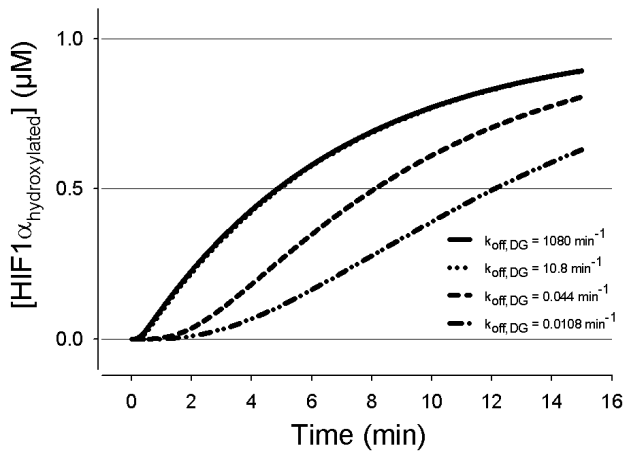

iii

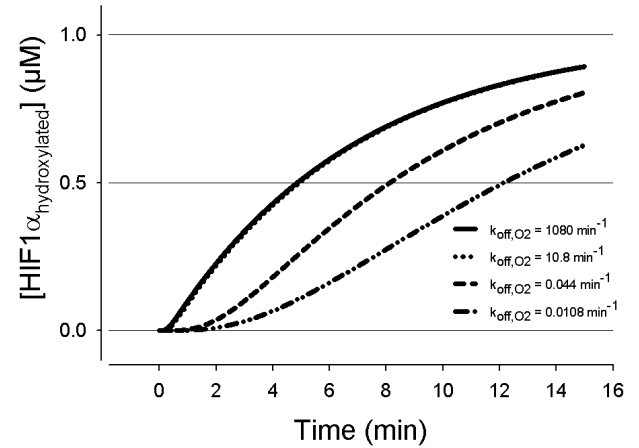

iv

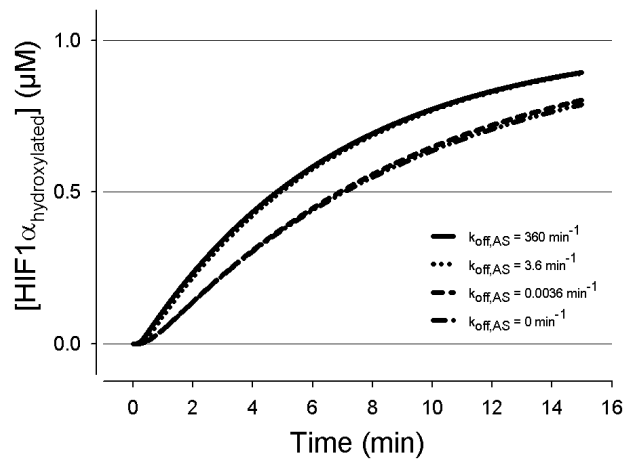

v

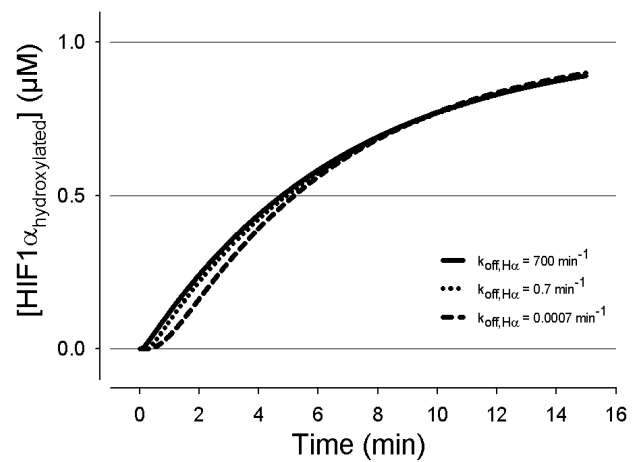

vi

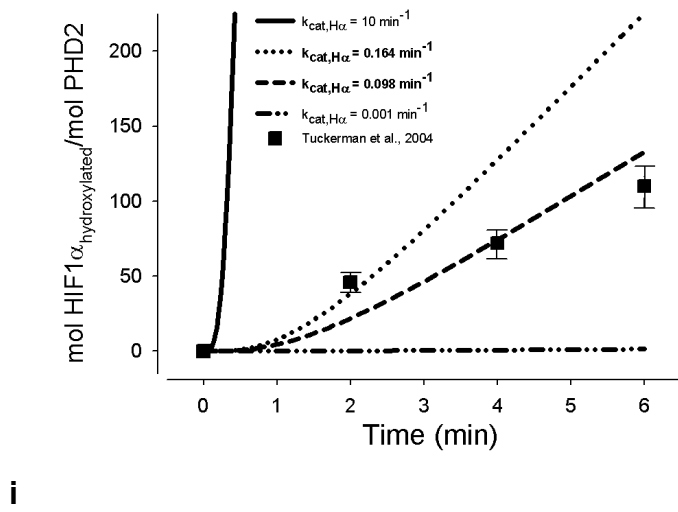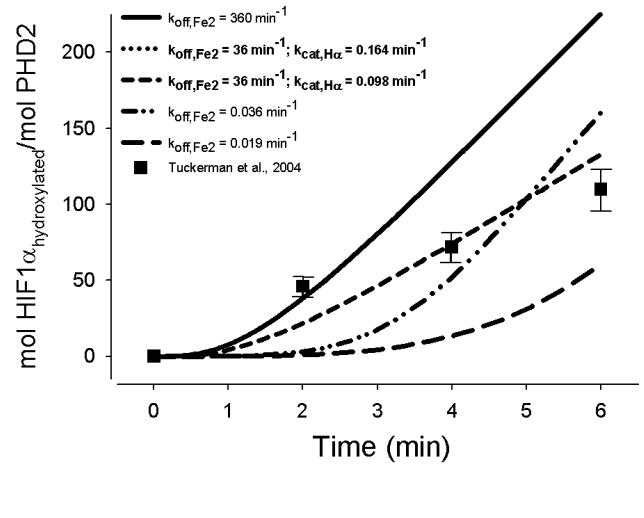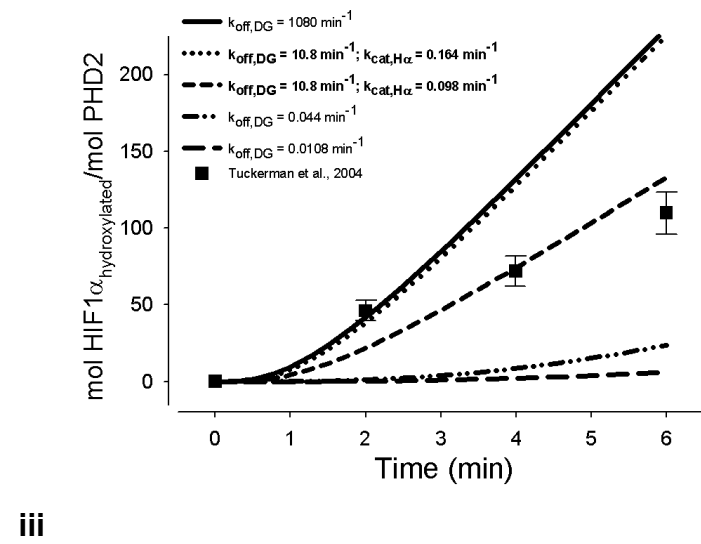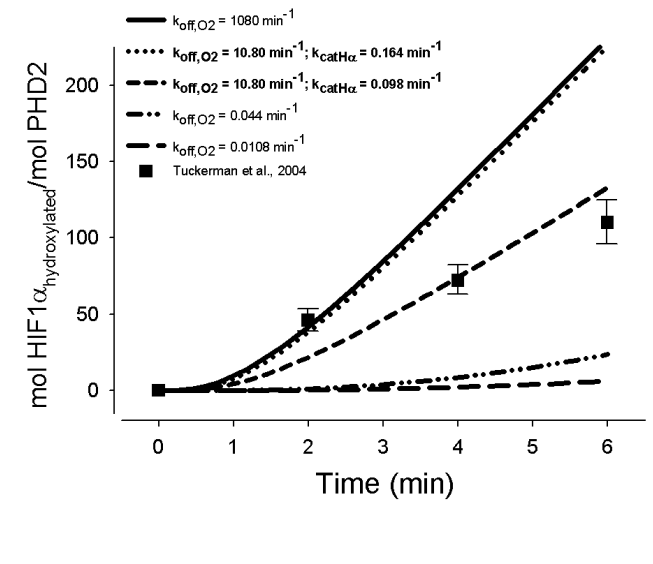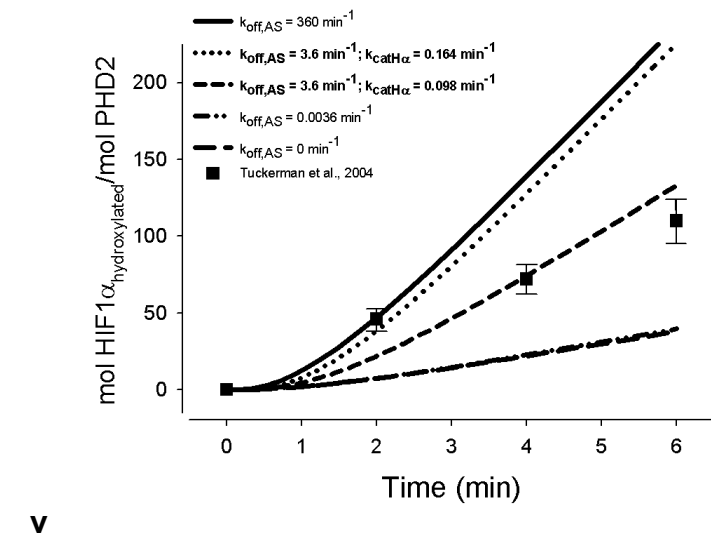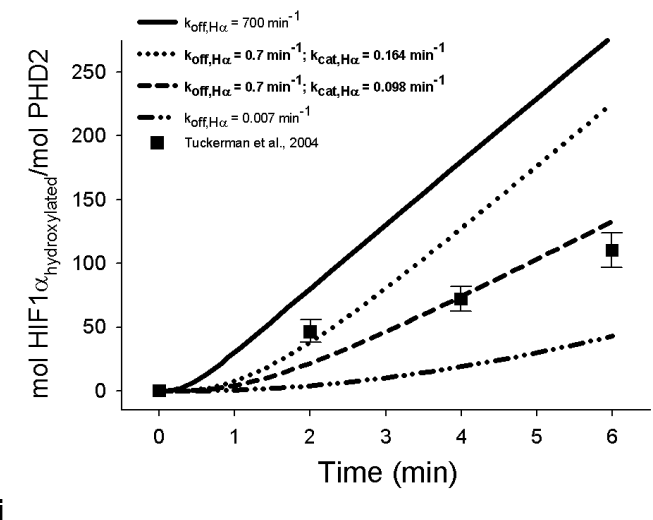

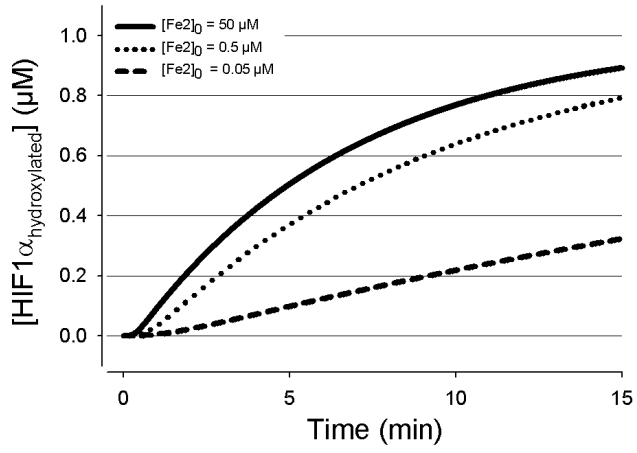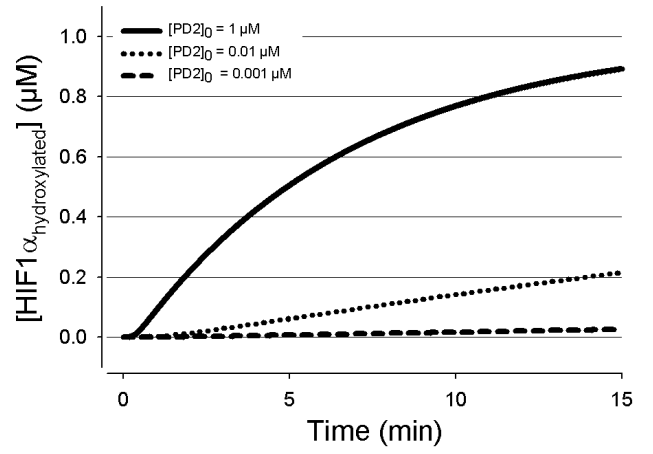

i

ii

## SUPPLEMENTAL FIGURE 4

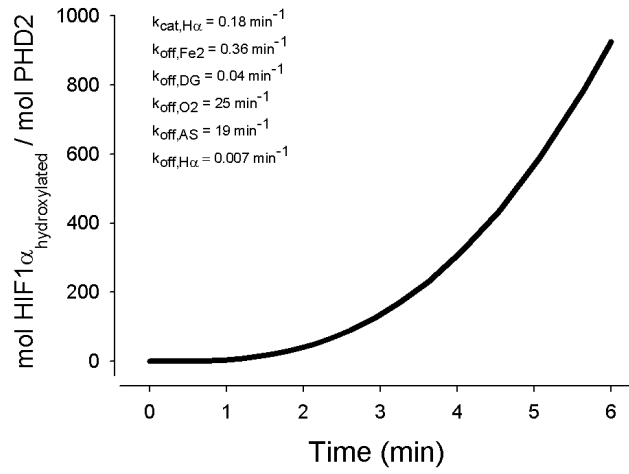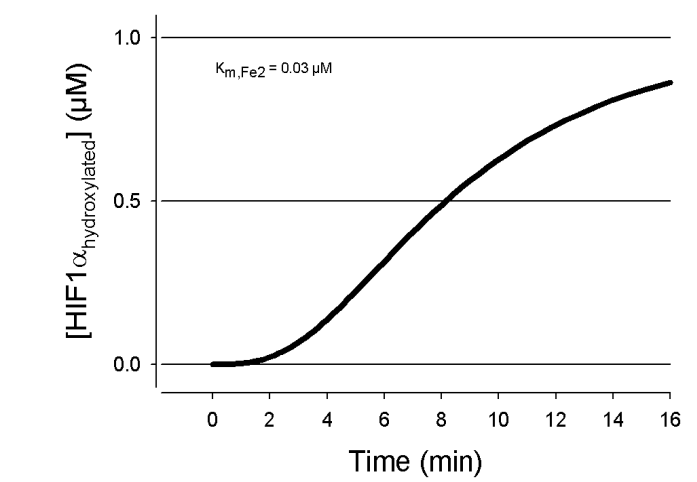

SUPPLEMENTAL FIGURE 5

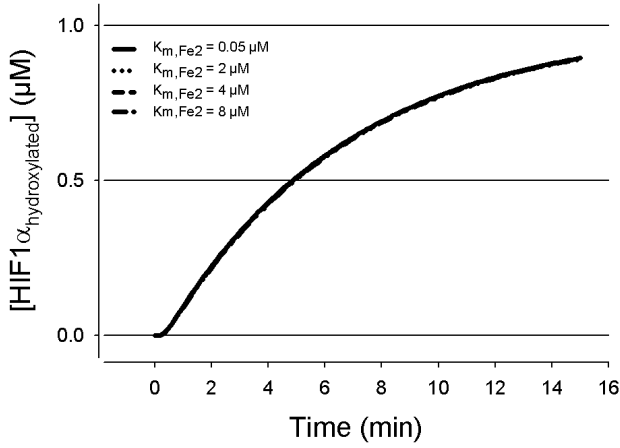

i

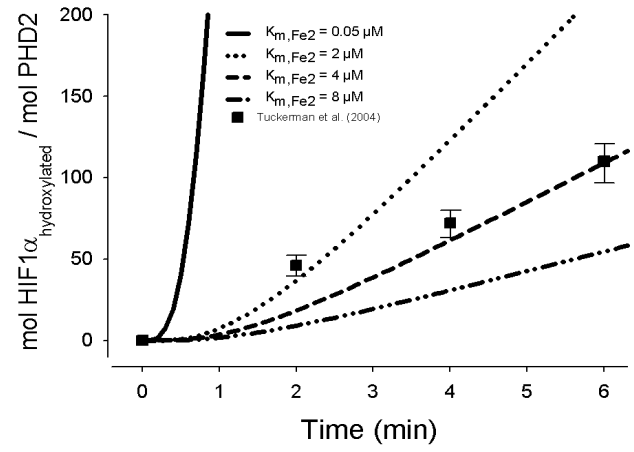

ii

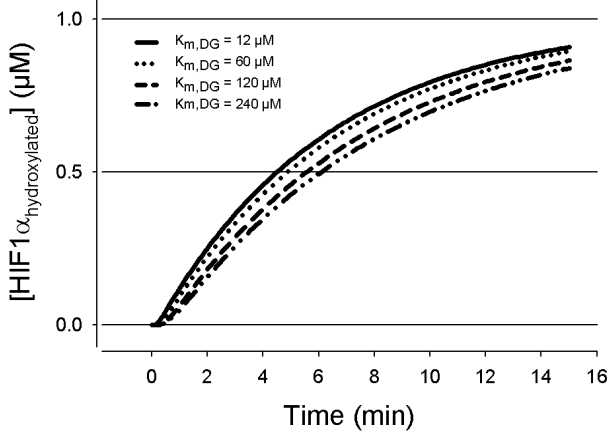

iii

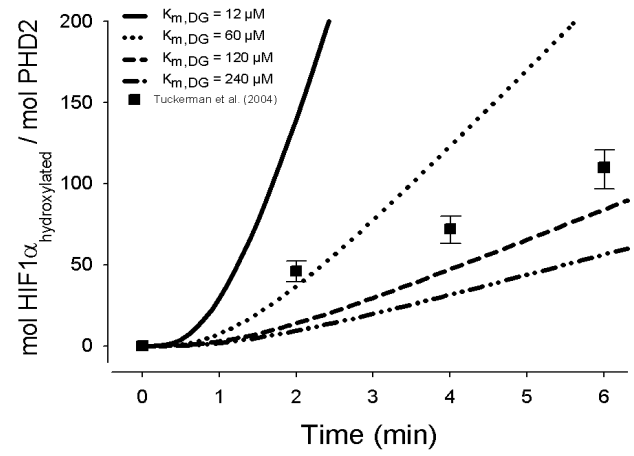

iv

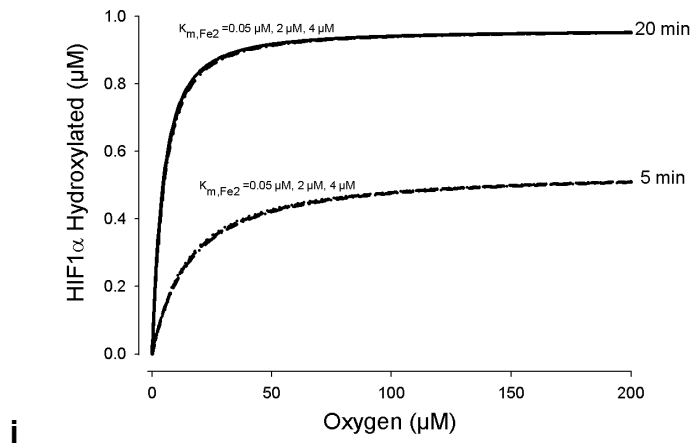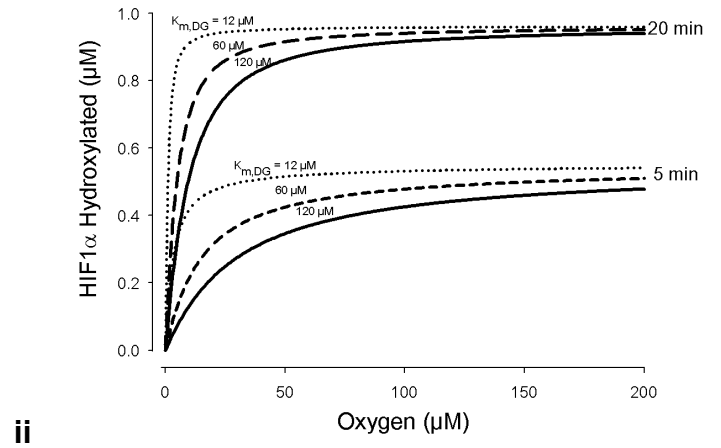

Supplement: NIHMS34781-supplement-supplement.pdf [file NIHMS34781-supplement-supplement.pdf]
